# Supplementary material for: Difference in Water CO<sub>2</sub> Dynamics between Riverine and Fringe Mangroves–A Case Study in Subtropical Mangroves
Source: Preprints.org preprint supplement (doi:10.20944/preprints202306.0966.v1), 2023-06-14
Supplement: Supplementary file 1 [file supplementary]

## Sheet: pCO2
Fukido River estuary (A riverine mangrove)			Yufu coast (A fringe mangrove)
Time	pCO2 in water (µatm)		Time	pCO2 in soil (µatm)	pCO2 in water (µatm)	pCO2 in air (µatm)
2022-08-20 15:59:27			2021-12-24 16:01:00	2353.97		403.762
2022-08-20 16:04:27			2021-12-24 16:06:00	2368.7		399.783
2022-08-20 16:09:27			2021-12-24 16:11:00	2387.57		399.346
2022-08-20 16:14:27			2021-12-24 16:16:00	2395.13		402.031
2022-08-20 16:19:27			2021-12-24 16:21:00	2434.01		399.072
2022-08-20 16:24:27			2021-12-24 16:26:00	2461.62		399.087
2022-08-20 16:29:27			2021-12-24 16:31:00	2494.67		398.387
2022-08-20 16:34:27			2021-12-24 16:36:00	2535.04		401.634
2022-08-20 16:39:27			2021-12-24 16:41:00	2560.9		398.639
2022-08-20 16:44:27			2021-12-24 16:46:00	2592.41		401.959
2022-08-20 16:49:27			2021-12-24 16:51:00	2626.23		398.129
2022-08-20 16:54:27			2021-12-24 16:56:00	2643.44		400.756
2022-08-20 16:59:27			2021-12-24 17:01:00	2656.92		401.255
2022-08-20 17:04:27			2021-12-24 17:06:00	2682.78		397.99
2022-08-20 17:09:27			2021-12-24 17:11:00	2692.26		402.844
2022-08-20 17:14:27			2021-12-24 17:16:00	2713.18		400.093
2022-08-20 17:19:27			2021-12-24 17:21:00	2719.36		403.351
2022-08-20 17:24:27	1378.65		2021-12-24 17:26:00	2739.53		400.235
2022-08-20 17:29:27	1436.57		2021-12-24 17:31:00	2745.26		399.43
2022-08-20 17:34:27	1479.15		2021-12-24 17:36:00	2735		400.905
2022-08-20 17:39:27	1461.22		2021-12-24 17:41:00	2736.71		401.55
2022-08-20 17:44:27	1480.78		2021-12-24 17:46:00	2757.79		401.026
2022-08-20 17:49:27	1516.16		2021-12-24 17:51:00	2759.69		401.365
2022-08-20 17:54:27	1550.59		2021-12-24 17:56:00	2759.49		404.848
2022-08-20 17:59:27	1578.49		2021-12-24 18:01:00	2754.98		400.337
2022-08-20 18:04:27	1604.48		2021-12-24 18:06:00	2759.36		403.547
2022-08-20 18:09:27	1613.59		2021-12-24 18:11:00	2767.16		400.406
2022-08-20 18:14:27	1599.88		2021-12-24 18:16:00	2764.1		407.523
2022-08-20 18:19:27	1622.22		2021-12-24 18:21:00	2780.04		404.535
2022-08-20 18:24:27	1651.28		2021-12-24 18:26:00	2784.05		401.266
2022-08-20 18:29:27	1619.25		2021-12-24 18:31:00	2781.17		405.278
2022-08-20 18:34:27	1622.8		2021-12-24 18:36:00	2773.6		401.266
2022-08-20 18:39:27	1669.5		2021-12-24 18:41:00	2787.61		404.44
2022-08-20 18:44:27	1687.24		2021-12-24 18:46:00	2800.53		399.732
2022-08-20 18:49:27	1695.58		2021-12-24 18:51:00	2797.85		400.709
2022-08-20 18:54:27	1696.44		2021-12-24 18:56:00	2802.16		401.295
2022-08-20 18:59:27	1731.73		2021-12-24 19:01:00	2803.78		399.776
2022-08-20 19:04:27	1729.52		2021-12-24 19:06:00	2799.82		400.545
2022-08-20 19:09:27	1737.87		2021-12-24 19:11:00	2810.52		399.9
2022-08-20 19:14:27	1753.02		2021-12-24 19:16:00	2815.23		402.574
2022-08-20 19:19:27	1760.59		2021-12-24 19:21:00	2825.01		399.306
2022-08-20 19:24:27	1789.36		2021-12-24 19:26:00	2819.24		406.054
2022-08-20 19:29:27	1781.88		2021-12-24 19:31:00	2825.35		399.488
2022-08-20 19:34:27	1769.8		2021-12-24 19:36:00	2830.8		404.969
2022-08-20 19:39:27	1769.03		2021-12-24 19:41:00	2811.26		402.177
2022-08-20 19:44:27	1707.47		2021-12-24 19:46:00	2807.91		399.236
2022-08-20 19:49:27	1659.62		2021-12-24 19:51:00	2811.1		402.877
2022-08-20 19:54:27	1678.41		2021-12-24 19:56:00	2803.55	420.084
2022-08-20 19:59:27	1681.58		2021-12-24 20:01:00	2805.16	441.901
2022-08-20 20:04:27	1697.59		2021-12-24 20:06:00	2787.65	455.599
2022-08-20 20:09:27	1634.49		2021-12-24 20:11:00	2772.88	447.597
2022-08-20 20:14:27	1558.07		2021-12-24 20:16:00	2767.4	428.677
2022-08-20 20:19:27	1513.96		2021-12-24 20:21:00	2761.36	401.623
2022-08-20 20:24:27	1499.86		2021-12-24 20:26:00	2753.21	375.364
2022-08-20 20:29:27	1492.77		2021-12-24 20:31:00	2736.19	375.076
2022-08-20 20:34:27	1456.52		2021-12-24 20:36:00	2734.32	373.349
2022-08-20 20:39:27	1410.58		2021-12-24 20:41:00	2729.89	377.46
2022-08-20 20:44:27	1353.91		2021-12-24 20:46:00	2732.18	389.605
2022-08-20 20:49:27	1348.64		2021-12-24 20:51:00	2701.42	393.475
2022-08-20 20:54:27	1281.13		2021-12-24 20:56:00	2708.5	403.139
2022-08-20 20:59:27	1257.35		2021-12-24 21:01:00	2709.83	401.944
2022-08-20 21:04:27	1236.06		2021-12-24 21:06:00	2710.1	406.98
2022-08-20 21:09:27	1186		2021-12-24 21:11:00	2702.74	402.097
2022-08-20 21:14:27	1183.41		2021-12-24 21:16:00	2691.92	402.545
2022-08-20 21:19:27	1132.4		2021-12-24 21:21:00	2693.77	403.646
2022-08-20 21:24:27	1132.11		2021-12-24 21:26:00	2677.23	409.425
2022-08-20 21:29:27	1090.11		2021-12-24 21:31:00	2673.78	404.298
2022-08-20 21:34:27	1048.88		2021-12-24 21:36:00	2677.27	401.066
2022-08-20 21:39:27	1023.75		2021-12-24 21:41:00	2681.62	400.749
2022-08-20 21:44:27	1009.75		2021-12-24 21:46:00	2655.9	398.941
2022-08-20 21:49:27	1008.7		2021-12-24 21:51:00	2645.22	402.192
2022-08-20 21:54:27	955.659		2021-12-24 21:56:00	2649.56	400.013
2022-08-20 21:59:27	953.626		2021-12-24 22:01:00	2655.88	406.171
2022-08-20 22:04:27	925.664		2021-12-24 22:06:00	2644.05	402.152
2022-08-20 22:09:27	909.611		2021-12-24 22:11:00	2632.08	403.777
2022-08-20 22:14:27	883.931		2021-12-24 22:16:00	2638.31	399.492
2022-08-20 22:19:27	866.153		2021-12-24 22:21:00	2640.66	399.652
2022-08-20 22:24:27	832.638		2021-12-24 22:26:00	2630.03	400.997
2022-08-20 22:29:27	835.304		2021-12-24 22:31:00	2624.08	400.971
2022-08-20 22:34:27	812.28		2021-12-24 22:36:00	2627.37	399.728
2022-08-20 22:39:27	816.941		2021-12-24 22:41:00	2616.51	402.283
2022-08-20 22:44:27	789.17		2021-12-24 22:46:00	2611.01	409.618
2022-08-20 22:49:27	793.226		2021-12-24 22:51:00	2608.53	411.127
2022-08-20 22:54:27	759.203		2021-12-24 22:56:00	2611.84	421.112
2022-08-20 22:59:27	752.664		2021-12-24 23:01:00	2610.76	426.869
2022-08-20 23:04:27	741.655		2021-12-24 23:06:00	2601.79	439.106
2022-08-20 23:09:27	751.954		2021-12-24 23:11:00	2611.64	443.577
2022-08-20 23:14:27	748.55		2021-12-24 23:16:00	2608.21	457.093
2022-08-20 23:19:27	720.635		2021-12-24 23:21:00	2602.94	464.84
2022-08-20 23:24:27	732.814		2021-12-24 23:26:00	2607.33	465.566
2022-08-20 23:29:27	709.119		2021-12-24 23:31:00	2603.5	479.726
2022-08-20 23:34:27	706.836		2021-12-24 23:36:00	2594.15	481.545
2022-08-20 23:39:27	700.939		2021-12-24 23:41:00	2596.77	491.118
2022-08-20 23:44:27	706.568		2021-12-24 23:46:00	2595.64	500.851
2022-08-20 23:49:27	684.963		2021-12-24 23:51:00	2602.3	516.713
2022-08-20 23:54:27	697.813		2021-12-24 23:56:00	2597.01	518.696
2022-08-20 23:59:27	678.596		2021-12-25 00:01:00	2597.35	525.849
2022-08-21 00:04:27	691.091		2021-12-25 00:06:00	2606.39	536.158
2022-08-21 00:09:27	672.823		2021-12-25 00:11:00	2612.09	546.595
2022-08-21 00:14:27	684.426		2021-12-25 00:16:00	2607.35	564.257
2022-08-21 00:19:27	661.45		2021-12-25 00:21:00	2620.06	572.019
2022-08-21 00:24:27	657.432		2021-12-25 00:26:00	2632.42	594.747
2022-08-21 00:29:27	661.613		2021-12-25 00:31:00	2629.94	607.283
2022-08-21 00:34:27	677.301		2021-12-25 00:36:00	2635.04	628.382
2022-08-21 00:39:27	660.798		2021-12-25 00:41:00	2639.83	669.571
2022-08-21 00:44:27	679.516		2021-12-25 00:46:00	2658.98	706.368
2022-08-21 00:49:27	661.489		2021-12-25 00:51:00	2651.91	746.059
2022-08-21 00:54:27	681.108		2021-12-25 00:56:00	2653.23	764.808
2022-08-21 00:59:27	664.471		2021-12-25 01:01:00	2665.89	757.728
2022-08-21 01:04:27	683.947		2021-12-25 01:06:00	2663.99	656.004
2022-08-21 01:09:27	667.367		2021-12-25 01:11:00	2662.6	616.564
2022-08-21 01:14:27	669.697		2021-12-25 01:16:00	2658.17	550.938
2022-08-21 01:19:27	670.253		2021-12-25 01:21:00	2681.04	502.134
2022-08-21 01:24:27	690.285		2021-12-25 01:26:00	2664.73	436.952
2022-08-21 01:29:27	674.185		2021-12-25 01:31:00	2661.91		410.799
2022-08-21 01:34:27	689.048		2021-12-25 01:36:00	2661.08		413.215
2022-08-21 01:39:27	677.886		2021-12-25 01:41:00	2676.3		405.719
2022-08-21 01:44:27	693.804		2021-12-25 01:46:00	2669.43		408.609
2022-08-21 01:49:27	680.753		2021-12-25 01:51:00	2654.09		405.985
2022-08-21 01:54:27	696.595		2021-12-25 01:56:00	2651.87		400.865
2022-08-21 01:59:27	686.584		2021-12-25 02:01:00	2665.96		405.679
2022-08-21 02:04:27	684.915		2021-12-25 02:06:00	2673.62		400.723
2022-08-21 02:09:27	690.822		2021-12-25 02:11:00	2666.84		405.533
2022-08-21 02:14:27	713.539		2021-12-25 02:16:00	2666.94		401.55
2022-08-21 02:19:27	704.151		2021-12-25 02:21:00	2667.19		400.235
2022-08-21 02:24:27	725.411		2021-12-25 02:26:00	2662.13		405.49
2022-08-21 02:29:27	719.504		2021-12-25 02:31:00	2654.01		400.184
2022-08-21 02:34:27	744.819		2021-12-25 02:36:00	2660.78		400.166
2022-08-21 02:39:27	738.308		2021-12-25 02:41:00	2670		401.044
2022-08-21 02:44:27	764.065		2021-12-25 02:46:00	2663.57		404.553
2022-08-21 02:49:27	763.519		2021-12-25 02:51:00	2661.29		400.169
2022-08-21 02:54:27	777.356		2021-12-25 02:56:00	2657.32		399.929
2022-08-21 02:59:27	794.041		2021-12-25 03:01:00	2660.5		403.872
2022-08-21 03:04:27	824.593		2021-12-25 03:06:00	2645.52		399.601
2022-08-21 03:09:27	824.996		2021-12-25 03:11:00	2639.18		403.835
2022-08-21 03:14:27	867.927		2021-12-25 03:16:00	2652.32		401.634
2022-08-21 03:19:27	887.508		2021-12-25 03:21:00	2656.16		400.319
2022-08-21 03:24:27	956.81		2021-12-25 03:26:00	2658.83		405.563
2022-08-21 03:29:27	977.82		2021-12-25 03:31:00	2656.18		401.051
2022-08-21 03:34:27	1021.26		2021-12-25 03:36:00	2645.63		405.428
2022-08-21 03:39:27	1030.66		2021-12-25 03:41:00	2670.06		400.246
2022-08-21 03:44:27	1066.33		2021-12-25 03:46:00	2668.95		400.545
2022-08-21 03:49:27	1106.99		2021-12-25 03:51:00	2667.86		403.784
2022-08-21 03:54:27	1180.35		2021-12-25 03:56:00	2681.99		399.973
2022-08-21 03:59:27	1240.76		2021-12-25 04:01:00	2685.08		404.273
2022-08-21 04:04:27	1335.5		2021-12-25 04:06:00	2690.31		400.552
2022-08-21 04:09:27	1411.83		2021-12-25 04:11:00	2690.09		401.452
2022-08-21 04:14:27	1500.72		2021-12-25 04:16:00	2680.89		403.183
2022-08-21 04:19:27	1552.7		2021-12-25 04:21:00	2684.71		400.967
2022-08-21 04:24:27	1679.08		2021-12-25 04:26:00	2695.87		401.215
2022-08-21 04:29:27	1784.66		2021-12-25 04:31:00	2692.69		401.55
2022-08-21 04:34:27	1921.5		2021-12-25 04:36:00	2682.47		404.531
2022-08-21 04:39:27	2056.52		2021-12-25 04:41:00	2683.89		401.488
2022-08-21 04:44:27	2170.15		2021-12-25 04:46:00	2683.74		407.082
2022-08-21 04:49:27	2272.47		2021-12-25 04:51:00	2691.52		404.229
2022-08-21 04:54:27	2442.01		2021-12-25 04:56:00	2685.4		401.937
2022-08-21 04:59:27	2579.23		2021-12-25 05:01:00	2673.46		405.085
2022-08-21 05:04:27	2756.25		2021-12-25 05:06:00	2672.49		401.423
2022-08-21 05:09:27	2892.8		2021-12-25 05:11:00	2676.19		405.573
2022-08-21 05:14:27	3078.93		2021-12-25 05:16:00	2670.89		401.284
2022-08-21 05:19:27	3267.46		2021-12-25 05:21:00	2677.9		407.425
2022-08-21 05:24:27	3471.32		2021-12-25 05:26:00	2687.06		402.833
2022-08-21 05:29:27	3662.25		2021-12-25 05:31:00	2674.13		400.61
2022-08-21 05:34:27	3859.02		2021-12-25 05:36:00	2676.16		404.724
2022-08-21 05:39:27	4025.01		2021-12-25 05:41:00	2679.59		400.61
2022-08-21 05:44:27	4210.56		2021-12-25 05:46:00	2679.48		403.139
2022-08-21 05:49:27	4365.14		2021-12-25 05:51:00	2679.57		402.746
2022-08-21 05:54:27	4526.15		2021-12-25 05:56:00	2670.28		408.226
2022-08-21 05:59:27	4650.04		2021-12-25 06:01:00	2666.54		402.684
2022-08-21 06:04:27	4788.8		2021-12-25 06:06:00	2678.21		402.272
2022-08-21 06:09:27	4871.46		2021-12-25 06:11:00	2663.67		407.505
2022-08-21 06:14:27	4964.76		2021-12-25 06:16:00	2644.17		402.687
2022-08-21 06:19:27	5014.72		2021-12-25 06:21:00	2655.17		406.805
2022-08-21 06:24:27	5082.04		2021-12-25 06:26:00	2660.35		404.13
2022-08-21 06:29:27	5099.01		2021-12-25 06:31:00	2665.1		410.478
2022-08-21 06:34:27	5144.56		2021-12-25 06:36:00	2649.55		405.905
2022-08-21 06:39:27	5160.38		2021-12-25 06:41:00	2649.07		404.134
2022-08-21 06:44:27	5216.38		2021-12-25 06:46:00	2653.76		408.551
2022-08-21 06:49:27	5200.75		2021-12-25 06:51:00	2649.21		404.152
2022-08-21 06:54:27	5218.4		2021-12-25 06:56:00	2641.38		409.043
2022-08-21 06:59:27	5202.38		2021-12-25 07:01:00	2641.37		404.703
2022-08-21 07:04:27	5206.79		2021-12-25 07:06:00	2644.69		404.014
2022-08-21 07:09:27	5221.94		2021-12-25 07:11:00	2643.5		407.687
2022-08-21 07:14:27	5235.37		2021-12-25 07:16:00	2644.47		404.571
2022-08-21 07:19:27	5227.22		2021-12-25 07:21:00	2650.91		404.01
2022-08-21 07:24:27	5241.89		2021-12-25 07:26:00	2655.78		404.156
2022-08-21 07:29:27	5232.68		2021-12-25 07:31:00	2664.48		409.367
2022-08-21 07:34:27	5239.3		2021-12-25 07:36:00	2651.52		404.932
2022-08-21 07:39:27	5206.12		2021-12-25 07:41:00	2652.35		404.444
2022-08-21 07:44:27	5218.88		2021-12-25 07:46:00	2661.83		409.305
2022-08-21 07:49:27	5194.14		2021-12-25 07:51:00	2665.35		404.407
2022-08-21 07:54:27	5187.42		2021-12-25 07:56:00	2651.38		409.159
2022-08-21 07:59:27	5189.15		2021-12-25 08:01:00	2650.66		404.484
2022-08-21 08:04:27	5213.03		2021-12-25 08:06:00	2656.88		409.564
2022-08-21 08:09:27	5192.79		2021-12-25 08:11:00	2660.91		408.594
2022-08-21 08:14:27	5206.03		2021-12-25 08:16:00	2646.69		405.176
2022-08-21 08:19:27	5212.36		2021-12-25 08:21:00	2652.09		409.378
2022-08-21 08:24:27	5181.29		2021-12-25 08:26:00	2654.6		404.469
2022-08-21 08:29:27	5173.14		2021-12-25 08:31:00	2656.49		410.249
2022-08-21 08:34:27	5155.2		2021-12-25 08:36:00	2641.21		405.497
2022-08-21 08:39:27	5136.22		2021-12-25 08:41:00	2641.86		404.495
2022-08-21 08:44:27	5144.56		2021-12-25 08:46:00	2646.43		409.637
2022-08-21 08:49:27	5100.54		2021-12-25 08:51:00	2643.68		405.996
2022-08-21 08:54:27	5073.02		2021-12-25 08:56:00	2643.8		405.803
2022-08-21 08:59:27	5068.8		2021-12-25 09:01:00	2637.86		406.433
2022-08-21 09:04:27	5033.23		2021-12-25 09:06:00	2618		411.211
2022-08-21 09:09:27	5005.42		2021-12-25 09:11:00	2632.8		406.412
2022-08-21 09:14:27	5019.04		2021-12-25 09:16:00	2638.45		405.191
2022-08-21 09:19:27	5013.57		2021-12-25 09:21:00	2631.37		409.793
2022-08-21 09:24:27	4992.19		2021-12-25 09:26:00	2632.07		404.462
2022-08-21 09:29:27	4974.45		2021-12-25 09:31:00	2648.66		410.067
2022-08-21 09:34:27	4979.14		2021-12-25 09:36:00	2633.25		405.482
2022-08-21 09:39:27	4974.54		2021-12-25 09:41:00	2637.58		407.257
2022-08-21 09:44:27	4953.92		2021-12-25 09:46:00	2639.29		411.342
2022-08-21 09:49:27	4943.09		2021-12-25 09:51:00	2651.32		405.77
2022-08-21 09:54:27	4964.95		2021-12-25 10:13:00	2613.72		385.138
2022-08-21 09:59:27	4976.17		2021-12-25 10:18:00	2618.93		395.122
2022-08-21 10:04:27	4964.95		2021-12-25 10:23:00	2599.96		394.226
2022-08-21 10:09:27	4982.31		2021-12-25 10:28:00	2603.96		398.449
2022-08-21 10:14:27	5005.99		2021-12-25 10:33:00	2605.5		396.387
2022-08-21 10:19:27	4974.35		2021-12-25 10:38:00	2598.01		394.725
2022-08-21 10:24:27	4872.13		2021-12-25 10:43:00	2605.77		398.391
2022-08-21 10:29:27	4854.39		2021-12-25 10:48:00	2608.29		394.372
2022-08-21 10:34:27			2021-12-25 10:53:00	2573.65		393.479
2022-08-21 10:39:27	4933.88		2021-12-25 10:58:00	2591.28		397.713
2022-08-21 10:44:27	4874.43		2021-12-25 11:03:00	2613.85		394.856
2022-08-21 10:49:27	4803.56		2021-12-25 11:08:00	2618.59		395.301
2022-08-21 10:54:27	4733.18		2021-12-25 11:13:00	2618.59		396.39
2022-08-21 10:59:27	4677.27		2021-12-25 11:18:00	2631.84		396.041
2022-08-21 11:04:27	4663.75		2021-12-25 11:23:00	2632.98		394.987
2022-08-21 11:09:27	4655.89		2021-12-25 11:28:00	2643.73		397.885
2022-08-21 11:14:27	4641.89		2021-12-25 11:33:00	2651.08		406.67
2022-08-21 11:19:27	4645.53		2021-12-25 11:38:00	2643.93		405.224
2022-08-21 11:24:27	4681.68		2021-12-25 11:43:00	2632.48	413.073
2022-08-21 11:29:27	4712.27		2021-12-25 11:48:00	2654.82	426.862
2022-08-21 11:34:27	4711.99		2021-12-25 11:53:00	2659.28	433.148
2022-08-21 11:39:27	4680.25		2021-12-25 11:58:00	2657.81	445.031
2022-08-21 11:44:27	4578.22		2021-12-25 12:03:00	2648.44	449.521
2022-08-21 11:49:27	4407.53		2021-12-25 12:08:00	2661.8	448.967
2022-08-21 11:54:27	4237.7		2021-12-25 12:13:00	2679.81	453.183
2022-08-21 11:59:27	4069.89		2021-12-25 12:18:00	2685.78	456.157
2022-08-21 12:04:27	3865.06		2021-12-25 12:23:00	2689.86	468.404
2022-08-21 12:09:27	3604.23		2021-12-25 12:28:00	2690.43	480.572
2022-08-21 12:14:27	3412.54		2021-12-25 12:33:00	2704.3	486.705
2022-08-21 12:19:27	3169.36		2021-12-25 12:38:00	2709.96	497.575
2022-08-21 12:24:27	2966.16		2021-12-25 12:43:00	2551.83	505.588
2022-08-21 12:29:27	2768.62		2021-12-25 12:48:00	1960.48	519.541
2022-08-21 12:34:27	2484.01		2021-12-25 12:53:00	2040.67	519.855
2022-08-21 12:39:27	2305.75		2021-12-25 12:58:00	2106.84	524.355
2022-08-21 12:44:27	2176.87		2021-12-25 13:03:00	2153.3	540.721
2022-08-21 12:49:27	2056.62		2021-12-25 13:08:00	2196.92	540.895
2022-08-21 12:54:27	1943.65		2021-12-25 13:13:00	2250.29	542.142
2022-08-21 12:59:27	1805.47		2021-12-25 13:18:00	2281.54	546.511
2022-08-21 13:04:27	1695.87		2021-12-25 13:23:00	2306.18	554.976
2022-08-21 13:09:27	1651.18		2021-12-25 13:28:00	2337.25	567.865
2022-08-21 13:14:27	1615.03		2021-12-25 13:33:00	2359.48	577.558
2022-08-21 13:19:27	1555.57		2021-12-25 13:38:00	2375.16	583.429
2022-08-21 13:24:27	1475.22		2021-12-25 13:43:00	2396.64	579.599
2022-08-21 13:29:27	1405.79		2021-12-25 13:48:00	2410.69	576.673
2022-08-21 13:34:27	1405.12		2021-12-25 13:53:00	2423.26	575.106
2022-08-21 13:39:27	1404.35		2021-12-25 13:58:00	2438.79	557.152
2022-08-21 13:44:27	1352.28		2021-12-25 14:03:00	2455.79	528.309
2022-08-21 13:49:27	1300.69		2021-12-25 14:08:00	2464.97	452.52
2022-08-21 13:54:27	1285.06		2021-12-25 14:13:00	2466.26	427.667
2022-08-21 13:59:27	1267.9		2021-12-25 14:18:00	2487.2		407.964
2022-08-21 14:04:27	1242.48		2021-12-25 14:23:00	2472.15		404.294
2022-08-21 14:09:27	1214.87		2021-12-25 14:28:00	2491.03		405.322
2022-08-21 14:14:27	1234.53		2021-12-25 14:33:00	2503.93		399.014
2022-08-21 14:19:27	1219.09		2021-12-25 14:38:00	2521.67		400.76
2022-08-21 14:24:27	1180.73		2021-12-25 14:43:00	2530.28		395.421
2022-08-21 14:29:27	1184.28		2021-12-25 14:48:00	2528.77		395.64
2022-08-21 14:34:27	1198.47		2021-12-25 14:53:00	2528.55		398.653
2022-08-21 14:39:27	1211.32		2021-12-25 14:58:00	2518.64		394.066
2022-08-21 14:44:27	1190.22		2021-12-25 15:03:00	2516.39		394.259
2022-08-21 14:49:27	1174.11		2021-12-25 15:08:00	2520.04		394.652
2022-08-21 14:54:27	1198.37		2021-12-25 15:13:00	2522.4		398.981
2022-08-21 14:59:27	1205.47		2021-12-25 15:18:00	2516.51		395.173
2022-08-21 15:04:27	1174.59		2021-12-25 15:23:00	2526.22		397.455
2022-08-21 15:09:27	1172.39		2021-12-25 15:28:00	2526.94		399.036
2022-08-21 15:14:27	1169.51		2021-12-25 15:33:00	2522.09		395.837
2022-08-21 15:19:27	1173.25		2021-12-25 15:38:00	2523.51		399.71
2022-08-21 15:24:27	1128.08		2021-12-25 15:43:00	2527.77		396.492
2022-08-21 15:29:27	1122.33		2021-12-25 15:48:00	2526.06		401.565
2022-08-21 15:34:27	1116.86		2021-12-25 15:53:00	2517.52		398.318
2022-08-21 15:39:27	1107.18		2021-12-25 15:58:00	2522.96		395.96
2022-08-21 15:44:27	1076.88		2021-12-25 16:03:00	2530.47		399.86
2022-08-21 15:49:27	1077.17		2021-12-25 16:08:00	2538.99		396.27
2022-08-21 15:54:27	1066.62		2021-12-25 16:13:00	2536.62		401.423
2022-08-21 15:59:27	1037.08		2021-12-25 16:18:00	2536.65		395.443
2022-08-21 16:04:27	1039.38		2021-12-25 16:23:00	2547.55		396.948
2022-08-21 16:09:27	1061.53		2021-12-25 16:28:00	2546.93		400.541
2022-08-21 16:14:27	1063.07		2021-12-25 16:33:00	2542.54		397.538
2022-08-21 16:19:27	1052.62		2021-12-25 16:38:00	2536.25		398.992
2022-08-21 16:24:27	1071.7		2021-12-25 16:43:00	2544.14		398.366
2022-08-21 16:29:27	1057.79		2021-12-25 16:48:00	2533.54		402.075
2022-08-21 16:34:27	1042.16		2021-12-25 16:53:00	2543.66		398.038
2022-08-21 16:39:27	1033.82		2021-12-25 16:58:00	2540.83		398.052
2022-08-21 16:44:27	1016.18		2021-12-25 17:03:00	2533.24		402.174
2022-08-21 16:49:27	981.943		2021-12-25 17:08:00	2540.69		399.586
2022-08-21 16:54:27	972.258		2021-12-25 17:13:00	2539.02		403.303
2022-08-21 16:59:27	966.697		2021-12-25 17:18:00	2531.27		398.69
2022-08-21 17:04:27	990.67		2021-12-25 17:23:00	2527.89		404.109
2022-08-21 17:09:27	983.382		2021-12-25 17:28:00	2531.68		403.573
2022-08-21 17:14:27	1008.12		2021-12-25 17:33:00	2524.71		399.532
2022-08-21 17:19:27	1005.15		2021-12-25 17:38:00	2520.49		404.582
2022-08-21 17:24:27	1010.33		2021-12-25 17:43:00	2512.8		400.796
2022-08-21 17:29:27	1035.64		2021-12-25 17:48:00	2513.99		405.796
2022-08-21 17:34:27	1043.99		2021-12-25 17:53:00	2515.4		404.149
2022-08-21 17:39:27	1035.55		2021-12-25 17:58:00	2514.61		400.8
2022-08-21 17:44:27	1053.77		2021-12-25 18:03:00	2503.83		404.593
2022-08-21 17:49:27	1062.4		2021-12-25 18:08:00	2500.68		400.654
2022-08-21 17:54:27	1048.68		2021-12-25 18:13:00	2515.36		401.532
2022-08-21 17:59:27	1067.29		2021-12-25 18:18:00	2502.99		404.914
2022-08-21 18:04:27	1051.66		2021-12-25 18:23:00	2518.48		401.791
2022-08-21 18:09:27	1053.48		2021-12-25 18:28:00	2519.47		401.58
2022-08-21 18:14:27	1059.9		2021-12-25 18:33:00	2520.1		401.966
2022-08-21 18:19:27	1058.37		2021-12-25 18:38:00	2536.06		402.855
2022-08-21 18:24:27	1077.93		2021-12-25 18:43:00	2534.26		402.469
2022-08-21 18:29:27	1090.49		2021-12-25 18:48:00	2524.44		401.561
2022-08-21 18:34:27	1059.42		2021-12-25 18:53:00	2509.06		405.814
2022-08-21 18:39:27	1068.92		2021-12-25 18:58:00	2505.78		401.82
2022-08-21 18:44:27	1061.73		2021-12-25 19:03:00	2517.14		405.821
2022-08-21 18:49:27	1059.04		2021-12-25 19:08:00	2527.23		406.641
2022-08-21 18:54:27	1073.04		2021-12-25 19:13:00	2526.78		404.841
2022-08-21 18:59:27	1066.23		2021-12-25 19:18:00	2531.29		406.517
2022-08-21 19:04:27	1092.03		2021-12-25 19:23:00	2545.95		402.99
2022-08-21 19:09:27	1083.78		2021-12-25 19:28:00	2544.69		408.893
2022-08-21 19:14:27	1102		2021-12-25 19:33:00	2548.03		407.519
2022-08-21 19:19:27	1088		2021-12-25 19:38:00	2544.07		403.001
2022-08-21 19:24:27	1091.26		2021-12-25 19:43:00	2548.01		406.251
2022-08-21 19:29:27	1108.14		2021-12-25 19:48:00	2551.79		402.615
2022-08-21 19:34:27	1088.38		2021-12-25 19:53:00	2560.83		407.33
2022-08-21 19:39:27	1106.22		2021-12-25 19:58:00	2559.82		404.367
2022-08-21 19:44:27	1087.23		2021-12-25 20:03:00	2556.47		403.314
2022-08-21 19:49:27	1102.96		2021-12-25 20:08:00	2564.25		407.862
2022-08-21 19:54:27	1090.69		2021-12-25 20:13:00	2554.79		402.902
2022-08-21 19:59:27	1094.52		2021-12-25 20:18:00	2553.77		404.145
2022-08-21 20:04:27	1088.96		2021-12-25 20:23:00	2566.44		402.738
2022-08-21 20:09:27	1099.7		2021-12-25 20:28:00	2572.49		402.935
2022-08-21 20:14:27	1116.86		2021-12-25 20:33:00	2555.89		402.163
2022-08-21 20:19:27	1096.63		2021-12-25 20:38:00	2572.05		402.367
2022-08-21 20:24:27	1117.34		2021-12-25 20:43:00	2561.75		406.55
2022-08-21 20:29:27	1111.3		2021-12-25 20:48:00	2561.52		402.174
2022-08-21 20:34:27	1119.26		2021-12-25 20:53:00	2567.65		402.724
2022-08-21 20:39:27	1134.13		2021-12-25 20:58:00	2571.33		405.286
2022-08-21 20:44:27	1152.15		2021-12-25 21:03:00	2558.97		402.05
2022-08-21 20:49:27	1143.91		2021-12-25 21:08:00	2555.82		407.068
2022-08-21 20:54:27	1168.26		2021-12-25 21:13:00	2549.75		403.835
2022-08-21 20:59:27	1159.82		2021-12-25 21:18:00	2556.06		402.21
2022-08-21 21:04:27	1175.84		2021-12-25 21:23:00	2557.21		407.122
2022-08-21 21:09:27	1166.44		2021-12-25 21:28:00	2552.22	422.664
2022-08-21 21:14:27	1183.32		2021-12-25 21:33:00	2552.26	458.11
2022-08-21 21:19:27	1172.29		2021-12-25 21:38:00	2563.4	472.522
2022-08-21 21:24:27	1177.18		2021-12-25 21:43:00	2564.77	478.425
2022-08-21 21:29:27	1179.77		2021-12-25 21:48:00	2563.91	503.183
2022-08-21 21:34:27	1205.47		2021-12-25 21:53:00	2560.28	513.357
2022-08-21 21:39:27	1194.25		2021-12-25 21:58:00	2568.76	521.312
2022-08-21 21:44:27	1223.59		2021-12-25 22:03:00	2563.44	516.324
2022-08-21 21:49:27	1219.18		2021-12-25 22:08:00	2564.56	507.006
2022-08-21 21:54:27	1239.51		2021-12-25 22:13:00	2560.37	499.226
2022-08-21 21:59:27	1224.94		2021-12-25 22:18:00	2563.45	488.454
2022-08-21 22:04:27	1238.46		2021-12-25 22:23:00	2571.36	479.581
2022-08-21 22:09:27	1220.33		2021-12-25 22:28:00	2557.85	484.413
2022-08-21 22:14:27	1206.62		2021-12-25 22:33:00	2563.69	486.942
2022-08-21 22:19:27	1193.87		2021-12-25 22:38:00	2560.28	491.242
2022-08-21 22:24:27	1214.2		2021-12-25 22:43:00	2561.5	495.567
2022-08-21 22:29:27	1197.22		2021-12-25 22:48:00	2561.08	505.483
2022-08-21 22:34:27	1210.17		2021-12-25 22:53:00	2571.02	492.163
2022-08-21 22:39:27	1153.88		2021-12-25 22:58:00	2567.04	484.584
2022-08-21 22:44:27	1150.81		2021-12-25 23:03:00	2559.25	482.594
2022-08-21 22:49:27	1130.96		2021-12-25 23:08:00	2563.47	469.002
2022-08-21 22:54:27	1132.59		2021-12-25 23:13:00	2567.21	470.361
2022-08-21 22:59:27	1122.23		2021-12-25 23:18:00	2568.7	468.659
2022-08-21 23:04:27	1100.18		2021-12-25 23:23:00	2560.79	464.017
2022-08-21 23:09:27	1083.3		2021-12-25 23:28:00	2553.92	463.368
2022-08-21 23:14:27	1049.07		2021-12-25 23:33:00	2543.3	474.195
2022-08-21 23:19:27	995.656		2021-12-25 23:38:00	2553.28	494.441
2022-08-21 23:24:27	973.888		2021-12-25 23:43:00	2552.73	497.174
2022-08-21 23:29:27	921.867		2021-12-25 23:48:00	2538.81	496.248
2022-08-21 23:34:27	920.064		2021-12-25 23:53:00	2535.21	504.021
2022-08-21 23:39:27	878.964		2021-12-25 23:58:00	2546.77	505.231
2022-08-21 23:44:27	877.746		2021-12-26 00:03:00	2544.16	510.143
2022-08-21 23:49:27	846.629		2021-12-26 00:08:00	2533.39	518.062
2022-08-21 23:54:27	840.847		2021-12-26 00:13:00	2530.16	528.899
2022-08-21 23:59:27	817.899		2021-12-26 00:18:00	2531.3	533.757
2022-08-22 00:04:27	815.071		2021-12-26 00:23:00	2535.82	547.298
2022-08-22 00:09:27	776.55		2021-12-26 00:28:00	2542.46	569.024
2022-08-22 00:14:27	776.292		2021-12-26 00:33:00	2536.79	599.627
2022-08-22 00:19:27	758.542		2021-12-26 00:38:00	2542.75	609.232
2022-08-22 00:24:27	766.53		2021-12-26 00:43:00	2520.21	649.681
2022-08-22 00:29:27	747.994		2021-12-26 00:48:00	2533.04	672.573
2022-08-22 00:34:27	761.543		2021-12-26 00:53:00	2533.66	685.28
2022-08-22 00:39:27	746.277		2021-12-26 00:58:00	2542.23	703.967
2022-08-22 00:44:27	745.385		2021-12-26 01:03:00	2546.71	705.519
2022-08-22 00:49:27	732.66		2021-12-26 01:08:00	2561.63	703.701
2022-08-22 00:54:27	743.439		2021-12-26 01:13:00	2563.84	702.444
2022-08-22 00:59:27	730.167		2021-12-26 01:18:00	2563.59	691.541
2022-08-22 01:04:27	742.115		2021-12-26 01:23:00	2560.16	687.084
2022-08-22 01:09:27	726.82		2021-12-26 01:28:00	2554.39	683.757
2022-08-22 01:14:27	735.364		2021-12-26 01:33:00	2566.34	686.574
2022-08-22 01:19:27	715.668		2021-12-26 01:38:00	2560.32	663.161
2022-08-22 01:24:27	732.152		2021-12-26 01:43:00	2554.8	635.222
2022-08-22 01:29:27	716.243		2021-12-26 01:48:00	2559.61	627.187
2022-08-22 01:34:27	721.393		2021-12-26 01:53:00	2567.18	480.466
2022-08-22 01:39:27	712.734		2021-12-26 01:58:00	2563.92		416.196
2022-08-22 01:44:27	729.16		2021-12-26 02:03:00	2564.17		406.82
2022-08-22 01:49:27	710.854		2021-12-26 02:08:00	2561.85		410.919
2022-08-22 01:54:27	719.245		2021-12-26 02:13:00	2560.32		409.024
2022-08-22 01:59:27	701.476		2021-12-26 02:18:00	2562.98		404.214
2022-08-22 02:04:27	715.409		2021-12-26 02:23:00	2556.69		406.477
2022-08-22 02:09:27	701.62		2021-12-26 02:28:00	2545.03		400.027
2022-08-22 02:14:27	716.224		2021-12-26 02:33:00	2543.9		399.564
2022-08-22 02:19:27	702.109		2021-12-26 02:38:00	2548.28		400.158
2022-08-22 02:24:27	705.321		2021-12-26 02:43:00	2548.28		399.892
2022-08-22 02:29:27	700.325		2021-12-26 02:48:00	2542.42		399.178
2022-08-22 02:34:27	719.264		2021-12-26 02:53:00	2542.53		398.398
2022-08-22 02:39:27	707.22		2021-12-26 02:58:00	2543.66		403.139
2022-08-22 02:44:27	726.945		2021-12-26 03:03:00	2555.25		399.335
2022-08-22 02:49:27	711.506		2021-12-26 03:08:00	2549.62		400.658
2022-08-22 02:54:27	723.915		2021-12-26 03:13:00	2552.89		403.398
2022-08-22 02:59:27	708.62		2021-12-26 03:18:00	2557.64		399.215
2022-08-22 03:04:27	723.637		2021-12-26 03:23:00	2572.68		402.691
2022-08-22 03:09:27	712.11		2021-12-26 03:28:00	2574.84		399.812
2022-08-22 03:14:27	716.33		2021-12-26 03:33:00	2569.04		405.366
2022-08-22 03:19:27	713.913		2021-12-26 03:38:00	2571.11		402.523
2022-08-22 03:24:27	730.138		2021-12-26 03:43:00	2580.96		399.273
2022-08-22 03:29:27	717.845		2021-12-26 03:48:00	2584.76		402.946
2022-08-22 03:34:27	741.454		2021-12-26 03:53:00	2581.89		399.284
2022-08-22 03:39:27	732.047		2021-12-26 03:58:00	2584.53		403.751
2022-08-22 03:44:27	756.998		2021-12-26 04:03:00	2589.59		400.126
2022-08-22 03:49:27	742.067		2021-12-26 04:08:00	2598.43		399.586
2022-08-22 03:54:27	760.095		2021-12-26 04:13:00	2603.91		404.036
2022-08-22 03:59:27	753.239		2021-12-26 04:18:00	2599.9		400.133
2022-08-22 04:04:27	757.333		2021-12-26 04:23:00	2603		399.255
2022-08-22 04:09:27	767.949		2021-12-26 04:28:00	2613.68		400.567
2022-08-22 04:14:27	797.772		2021-12-26 04:33:00	2619.41		404.969
2022-08-22 04:19:27	791.155		2021-12-26 04:38:00	2611.31		399.954
2022-08-22 04:24:27	817.756		2021-12-26 04:43:00	2611.4		398.77
2022-08-22 04:29:27	810.803		2021-12-26 04:48:00	2613.54		403.544
2022-08-22 04:34:27	839.888		2021-12-26 04:53:00	2624.02		399.561
2022-08-22 04:39:27	847.77		2021-12-26 04:58:00	2617.91		405.351
2022-08-22 04:44:27	887.173		2021-12-26 05:03:00	2610.54		399.758
2022-08-22 04:49:27	898.258		2021-12-26 05:08:00	2606.95		406.546
2022-08-22 04:54:27	929.797		2021-12-26 05:13:00	2626.01		404.058
2022-08-22 04:59:27	976.286		2021-12-26 05:18:00	2617.07		401.281
2022-08-22 05:04:27	1025.1		2021-12-26 05:23:00	2614.35		404.196
2022-08-22 05:09:27	1047.34		2021-12-26 05:28:00	2610.29		398.515
2022-08-22 05:14:27	1112.84		2021-12-26 05:33:00	2613.16		404.79
2022-08-22 05:19:27	1170.18		2021-12-26 05:38:00	2622.46		400.8
2022-08-22 05:24:27	1266.94		2021-12-26 05:43:00	2628.78		399.907
2022-08-22 05:29:27	1302.9		2021-12-26 05:48:00	2631.51		404.437
2022-08-22 05:34:27	1419.31		2021-12-26 05:53:00	2636.13		399.918
2022-08-22 05:39:27	1503.7		2021-12-26 05:58:00	2649.67		400.618
2022-08-22 05:44:27	1604.96		2021-12-26 06:03:00	2650.36		400.217
2022-08-22 05:49:27	1721.47		2021-12-26 06:08:00	2653.82		404.746
2022-08-22 05:54:27	1817.75		2021-12-26 06:13:00	2658.68		400.61
2022-08-22 05:59:27	1908.56		2021-12-26 06:18:00	2663.59		400.927
2022-08-22 06:04:27	2085.96		2021-12-26 06:23:00	2674.5		404.232
2022-08-22 06:09:27	2206.88		2021-12-26 06:28:00	2669		400.891
2022-08-22 06:14:27	2367.21		2021-12-26 06:33:00	2677.16		404.874
2022-08-22 06:19:27	2511.91		2021-12-26 06:38:00	2684.28		400.086
2022-08-22 06:24:27	2708.78		2021-12-26 06:43:00	2682.48		401.984
2022-08-22 06:29:27	2906.8		2021-12-26 06:48:00	2680.32		404.498
2022-08-22 06:34:27	3121.22		2021-12-26 06:53:00	2676.22		401.354
2022-08-22 06:39:27	3338.22		2021-12-26 06:58:00	2687.61		405.358
2022-08-22 06:44:27	3523.3		2021-12-26 07:03:00	2684.48		401.525
2022-08-22 06:49:27	3743.37		2021-12-26 07:08:00	2685.66		406.944
2022-08-22 06:54:27	3924.99		2021-12-26 07:13:00	2676		402.826
2022-08-22 06:59:27	4122.63		2021-12-26 07:18:00	2676.02		402.239
2022-08-22 07:04:27	4277.11		2021-12-26 07:23:00	2677.86		404.925
2022-08-22 07:09:27	4438.02		2021-12-26 07:28:00	2681.25		400.96
2022-08-22 07:14:27	4572.17		2021-12-26 07:33:00	2683.85		401.091
2022-08-22 07:19:27	4728.19		2021-12-26 07:38:00	2677.59		402.378
2022-08-22 07:24:27	4837.03		2021-12-26 07:43:00	2687.29		405.942
2022-08-22 07:29:27	4962.46		2021-12-26 07:48:00	2679.92		402.461
2022-08-22 07:34:27	4986.53		2021-12-26 07:53:00	2687.58		401.543
2022-08-22 07:39:27	5009.64		2021-12-26 07:58:00	2685.79		405.741
2022-08-22 07:44:27	5029.1		2021-12-26 08:03:00	2688.16		401.077
2022-08-22 07:49:27	5056.24		2021-12-26 08:08:00	2696.95		406.087
2022-08-22 07:54:27	5043.97		2021-12-26 08:13:00	2701.63		402.104
2022-08-22 07:59:27	5039.08		2021-12-26 08:18:00	2694.19		403.096
2022-08-22 08:04:27	5076.09		2021-12-26 08:23:00	2696.91		406.539
2022-08-22 08:09:27	5041.47		2021-12-26 08:28:00	2707.13		402.272
2022-08-22 08:14:27	5041.76		2021-12-26 08:33:00	2698.56		407.009
2022-08-22 08:19:27	5024.88		2021-12-26 08:38:00	2705.11		402.133
2022-08-22 08:24:27	5012.9		2021-12-26 08:43:00	2696.71		407.716
2022-08-22 08:29:27	5002.25		2021-12-26 08:48:00	2709.99		404.174
2022-08-22 08:34:27	4970.23		2021-12-26 08:53:00	2710.76		402.287
2022-08-22 08:39:27	4977.51		2021-12-26 08:58:00	2713.69		406.047
2022-08-22 08:44:27	4975.6		2021-12-26 09:03:00	2716.65		401.875
2022-08-22 08:49:27	4936.76		2021-12-26 09:08:00	2726.67		402.644
2022-08-22 08:54:27	4941.36		2021-12-26 09:13:00	2733.27		402.33
2022-08-22 08:59:27	4945.1		2021-12-26 09:18:00	2727.98		407.807
2022-08-22 09:04:27	4933.88		2021-12-26 09:23:00	2722.48		403.536
2022-08-22 09:09:27	4927.94		2021-12-26 09:28:00	2725.85		403.7
2022-08-22 09:14:27	4938.96		2021-12-26 09:33:00	2729.92		407.581
2022-08-22 09:19:27	4901.95		2021-12-26 09:38:00	2733.11		402.687
2022-08-22 09:24:27	4933.12		2021-12-26 09:43:00	2726.13		406.878
2022-08-22 09:29:27	4940.59		2021-12-26 09:48:00	2739.54		403.004
2022-08-22 09:34:27	4977.61		2021-12-26 09:53:00	2753.4		407.21
2022-08-22 09:39:27	4947.79		2021-12-26 09:58:00	2738.14		406.492
2022-08-22 09:44:27	4903.77		2021-12-26 10:03:00	2736.65		402.476
2022-08-22 09:49:27	4887.18		2021-12-26 10:08:00	2741.56		406.459
2022-08-22 09:54:27	4901.28		2021-12-26 10:13:00	2753.96		402.086
2022-08-22 09:59:27	4898.5		2021-12-26 10:18:00	2772.1		407.035
2022-08-22 10:04:27	4881.14		2021-12-26 10:23:00	2762.42		402.8
2022-08-22 10:09:27	4856.02		2021-12-26 10:28:00	2775.92		403.555
2022-08-22 10:14:27	4812.67		2021-12-26 10:33:00	2783.09		406.82
2022-08-22 10:19:27	4779.3		2021-12-26 10:38:00	2795.9		402.651
2022-08-22 10:24:27	4748.23		2021-12-26 10:43:00	2798.28		403.289
2022-08-22 10:29:27	4697.79		2021-12-26 10:48:00	2797.99		403.751
2022-08-22 10:34:27	4658.96		2021-12-26 10:53:00	2798.37		408.525
2022-08-22 10:39:27	4621.56		2021-12-26 10:58:00	2800.8		403.434
2022-08-22 10:44:27	4599.02		2021-12-26 11:03:00	2816.53		405.169
2022-08-22 10:49:27	4555.97		2021-12-26 11:08:00	2813.2		406.565
2022-08-22 10:54:27	4524.52		2021-12-26 11:13:00	2214.26		402.997
2022-08-22 10:59:27	4527.39		2021-12-26 11:18:00	2328.57		407.877
2022-08-22 11:04:27	4552.52		2021-12-26 11:23:00	2378.23		403.037
2022-08-22 11:09:27	4546.57		2021-12-26 11:28:00	2408.35		408.117
2022-08-22 11:14:27	4539.76		2021-12-26 11:33:00	2436.49		403.23
2022-08-22 11:19:27	4550.79		2021-12-26 11:38:00	2463.48		402.356
2022-08-22 11:24:27	4536.21		2021-12-26 11:43:00	2476.81		407.013
2022-08-22 11:29:27	4553.57		2021-12-26 11:48:00	2502.63		403.059
2022-08-22 11:34:27	4571.89		2021-12-26 11:53:00	2530.94		406.069
2022-08-22 11:39:27	4531.52		2021-12-26 11:58:00	2553.62		401.835
2022-08-22 11:44:27	4489.04		2021-12-26 12:03:00	2574.15		401.846
2022-08-22 11:49:27	4477.91		2021-12-26 12:08:00	2590.51		405.788
2022-08-22 11:54:27	4467.27		2021-12-26 12:13:00	2600.34		393.074
2022-08-22 11:59:27	4453.27		2021-12-26 12:18:00	2619.74	353.657
2022-08-22 12:04:27	4362.94		2021-12-26 12:23:00	2641.2	328.862
2022-08-22 12:09:27	4343.76		2021-12-26 12:28:00	2643.28	318.058
2022-08-22 12:14:27	4348.17		2021-12-26 12:33:00	2657.46	309.024
2022-08-22 12:19:27			2021-12-26 12:38:00	2668.87	317.132
2022-08-22 12:24:27			2021-12-26 12:43:00	2690.19	322.948
2022-08-22 12:29:27	4665.19		2021-12-26 12:48:00	2702.16	329.118
2022-08-22 12:34:27	4547.34		2021-12-26 12:53:00	2724.28	342.036
2022-08-22 12:39:27	4498.82		2021-12-26 12:58:00	2771.85	343.031
2022-08-22 12:44:27	4482.99		2021-12-26 13:03:00	2783.58	349.714
2022-08-22 12:49:27	4484.43		2021-12-26 13:08:00	2778.6	339.438
2022-08-22 12:54:27	4501.79		2021-12-26 13:13:00	2771.15	345.629
2022-08-22 12:59:27	4473.6		2021-12-26 13:18:00	2771.28	350.056
2022-08-22 13:04:27	4297.06		2021-12-26 13:23:00	2767.63	348.304
2022-08-22 13:09:27	4058.67		2021-12-26 13:28:00	2779.43	347.852
2022-08-22 13:14:27	3798.61		2021-12-26 13:33:00	2772.8	341.657
2022-08-22 13:19:27	3458.95		2021-12-26 13:38:00	2766.78	344.291
2022-08-22 13:24:27	3277.72		2021-12-26 13:43:00	2775.85	351.379
2022-08-22 13:29:27	3029.64		2021-12-26 13:48:00	2773.98	360.81
2022-08-22 13:34:27	2810.24		2021-12-26 13:53:00	2767.65	363.536
2022-08-22 13:39:27	2550.18		2021-12-26 13:58:00	2766.44	364.414
2022-08-22 13:44:27	2381.12		2021-12-26 14:03:00	2768.65	370.259
2022-08-22 13:49:27	2258.47		2021-12-26 14:08:00	2765.85	363.707
2022-08-22 13:54:27	2094.4		2021-12-26 14:13:00	2771.55	371.494
2022-08-22 13:59:27	1974.82		2021-12-26 14:18:00	2761.78	375.146
2022-08-22 14:04:27	1856.2		2021-12-26 14:23:00	2756.24	384.376
2022-08-22 14:09:27	1778.72		2021-12-26 14:28:00	2758.11	384.361
2022-08-22 14:14:27	1752.83		2021-12-26 14:33:00	2760.17	378.597
2022-08-22 14:19:27	1686.95		2021-12-26 14:38:00	2751.41	384.992
2022-08-22 14:24:27	1564.78		2021-12-26 14:43:00	2746.44	382.62
2022-08-22 14:29:27	1550.4		2021-12-26 14:48:00	2755.81	388.155
2022-08-22 14:34:27	1534.77		2021-12-26 14:53:00	2743.76	388.319
2022-08-22 14:39:27	1536.49		2021-12-26 14:58:00	2739.13		395.891
2022-08-22 14:44:27	1460.64		2021-12-26 15:03:00	2736.3		405.329
2022-08-22 14:49:27	1391.79		2021-12-26 15:08:00	2745.17		402.738
2022-08-22 14:54:27	1355.64		2021-12-26 15:13:00	2741.47		401.871
2022-08-22 14:59:27	1382.39		2021-12-26 15:18:00	2734.36		401.649
2022-08-22 15:04:27	1335.98		2021-12-26 15:23:00	2736.05		405.694
2022-08-22 15:09:27	1314.5		2021-12-26 15:28:00	2743.2		401.871
2022-08-22 15:14:27	1207.39		2021-12-26 15:33:00	2742.62		407.833
2022-08-22 15:19:27	1172.2		2021-12-26 15:38:00	2730.67		405.938
2022-08-22 15:24:27	1188.98		2021-12-26 15:43:00	2728.59		403.587
2022-08-22 15:29:27	1156.76		2021-12-26 15:48:00	2810.42
2022-08-22 15:34:27	1139.88		2021-12-26 15:53:00	2817.13
2022-08-22 15:39:27	1108.43		2021-12-26 15:58:00	2807.59
2022-08-22 15:44:27	1116.96
2022-08-22 15:49:27	1108.62
2022-08-22 15:54:27	1088.48
2022-08-22 15:59:27	1121.56

## Sheet: Water quality in Yufu
Time	Water Temperature (°C)	DO (%)	pHT	TA (µM)	DIC (µM)	ΔTA (µM)	ΔDIC (µM)		Time	Water Temperature (°C)	Salinity_HOBO
2021-12-25 11:34:59	18.903	97.02	7.826	2744.73	2555.02	2442.95	2236.71		2021-12-24 19:52:59	21.99	20.4728
2021-12-25 11:50:00	18.989	101.141	7.907	2775.04	2532.95	2353.11	2100.16		2021-12-24 19:54:00	21.89	23.2467
2021-12-25 12:05:00	19.106	100.232	7.824	2824.18	2625.67	2543.37	2326.24		2021-12-24 19:54:59	21.84	23.6183
2021-12-25 12:19:59	19.176	98.658	7.854	2788.72	2561.97	2554.59	2299.74		2021-12-24 19:56:00	21.79	23.5775
2021-12-25 12:34:59	19.099	94.519	7.752	2855.86	2781.17	2483.95	2412.21		2021-12-24 19:57:00	21.74	23.7126
2021-12-25 12:49:59	18.872	91.174	7.84	2884.24	2690.65	2771.24	2546.93		2021-12-24 19:57:59	21.69	23.8846
2021-12-25 13:19:59	17.298	100.762	7.82	2930.87	2752.22	2656.57	2463.02		2021-12-24 19:59:00	21.67	23.8777
2021-12-25 13:34:59	17.546	100.687	7.779	3010.29	2833.5	2747.71	2556.3		2021-12-24 19:59:59	21.66	24.1292
2021-12-25 13:49:59	17.414	101.775	7.752	3098.81	2923.47	2849.3	2659.55		2021-12-24 20:01:00	21.67	24.1419
2021-12-25 14:04:59	18.386	101.465	7.901	3015.33	2831.55	2753.49	2554.06		2021-12-24 20:01:59	21.69	23.9294
2021-12-25 14:19:59	18.386		7.841	3122.2	2934.3	2876.14	2671.98		2021-12-24 20:03:00	21.71	23.8333
2021-12-25 14:34:59	18.386		7.811	3161.85	2976.82	2921.64	2720.78		2021-12-24 20:03:59	21.72	23.7456
2021-12-25 14:49:59	18.386		7.93	3137.26	2937.71	2893.42	2675.89		2021-12-24 20:05:00	21.72	23.915
2021-12-26 12:20:00	16.346	107.61	8.043	2489.96	2206.59	1728.36	1476.23		2021-12-24 20:06:00	21.7	24.148
2021-12-26 12:35:00	16.427	107.57	8.076	2506.92	2225.48	1779.67	1524.2		2021-12-24 20:06:59	21.67	24.3117
2021-12-26 12:50:00	16.603	108.903	8.021	2543.07	2285.54	1799.47	1568.33		2021-12-24 20:08:00	21.64	24.4051
2021-12-26 13:05:00	16.587	106.819	7.985	2668.24	2406.41	1915.58	1680.52		2021-12-24 20:08:59	21.61	24.4664
2021-12-26 13:20:00	16.617	105.273	7.904	2814.79	2585.51	2046.07	1842.02		2021-12-24 20:10:00	21.58	24.4205
2021-12-26 13:35:00	16.644	105.031	7.961	2650.69	2387.89	1879.84	1646.28		2021-12-24 20:10:59	21.56	24.5041
2021-12-26 13:50:00	16.789	104.518	8.014	2698.77	2442.61	1903.92	1678.9		2021-12-24 20:12:00	21.55	24.3307
2021-12-26 14:05:00	17.152	107.03	8.009	2677.45	2413.62	1889.85	1657.15		2021-12-24 20:12:59	21.52	24.5478
2021-12-26 14:20:00	17.173	104.829	7.999	2759.57	2496.57	2058.45	1815.49		2021-12-24 20:14:00	21.51	24.5395
2021-12-26 14:35:00	17.151	103.996	8.03	2740.96	2467.72	2183.46	1912.97		2021-12-24 20:15:00	21.51	24.5559
2021-12-26 14:50:00	17.086	103.922	7.966	2804.62	2548.47	2190.15	1943.83		2021-12-24 20:15:59	21.51	24.5278
2021-12-26 15:05:00	17.014	106.571	8.082	2782.77	2500.3	2046.73	1789.36		2021-12-24 20:17:00	21.48	24.8194
2021-12-26 15:20:00	15.487	104.23	7.965	2891.24	2626.32	2149.2	1908.4		2021-12-24 20:17:59	21.48	24.8123
2021-12-26 15:35:00	16.956	105.075	7.971	2958.17	2687.9	2212.42	1966.57		2021-12-24 20:19:00	21.48	24.8123
									2021-12-24 20:19:59	21.48	24.7836
									2021-12-24 20:21:00	21.47	24.8132
									2021-12-24 20:21:59	21.46	24.7951
									2021-12-24 20:23:00	21.47	24.7679
									2021-12-24 20:24:00	21.47	24.7893
									2021-12-24 20:24:59	21.47	24.6588
									2021-12-24 20:26:00	21.47	24.7726
									2021-12-24 20:26:59	21.47	24.7822
									2021-12-24 20:28:00	21.49	24.735
									2021-12-24 20:28:59	21.49	24.671
									2021-12-24 20:30:00	21.52	24.6633
									2021-12-24 20:30:59	21.53	24.5515
									2021-12-24 20:32:00	21.56	24.5204
									2021-12-24 20:33:00	21.6	24.5635
									2021-12-24 20:33:59	21.61	24.6214
									2021-12-24 20:35:00	21.62	24.6204
									2021-12-24 20:35:59	21.66	24.6095
									2021-12-24 20:37:00	21.7	24.608
									2021-12-24 20:37:59	21.71	24.5693
									2021-12-24 20:39:00	21.78	24.6502
									2021-12-24 20:39:59	21.87	24.6561
									2021-12-24 20:41:00	21.88	24.6528
									2021-12-24 20:42:00	21.89	24.6424
									2021-12-24 20:42:59	21.9	24.6939
									2021-12-24 20:44:00	21.93	24.7079
									2021-12-24 20:44:59	21.96	24.7028
									2021-12-24 20:46:00	22.01	24.7487
									2021-12-24 20:46:59	22.02	24.7526
									2021-12-24 20:48:00	22.03	24.7806
									2021-12-24 20:48:59	22.04	24.8038
									2021-12-24 20:50:00	22.06	24.7659
									2021-12-24 20:51:00	22.06	24.7442
									2021-12-24 20:51:59	22.06	24.7178
									2021-12-24 20:53:00	22.04	24.7388
									2021-12-24 20:53:59	22.04	24.7148
									2021-12-24 20:55:00	22.03	24.699
									2021-12-24 20:55:59	22.03	24.7037
									2021-12-24 20:57:00	22.06	24.7226
									2021-12-24 20:57:59	22.07	24.741
									2021-12-24 20:59:00	22.07	24.7555
									2021-12-24 21:00:00	22.07	24.7458
									2021-12-24 21:00:59	22.07	24.7434
									2021-12-24 21:02:00	22.2	24.7998
									2021-12-24 21:02:59	22.24	24.8061
									2021-12-24 21:04:00	22.26	24.8044
									2021-12-24 21:04:59	22.27	24.7914
									2021-12-24 21:06:00	22.31	24.81
									2021-12-24 21:06:59	22.33	24.8108
									2021-12-24 21:08:00	22.3	24.3573
									2021-12-24 21:09:00	22.29	24.8116
									2021-12-24 21:09:59	22.27	24.7842
									2021-12-24 21:11:00	22.27	24.7672
									2021-12-24 21:11:59	22.24	24.7263
									2021-12-24 21:13:00	22.22	24.7015
									2021-12-24 21:13:59	22.21	24.7193
									2021-12-24 21:15:00	22.21	24.7265
									2021-12-24 21:15:59	22.24	24.7023
									2021-12-24 21:17:00	22.24	24.7625
									2021-12-24 21:18:00	22.22	24.7666
									2021-12-24 21:18:59	22.24	24.7408
									2021-12-24 21:20:00	22.25	24.7641
									2021-12-24 21:20:59	22.25	24.7737
									2021-12-24 21:22:00	22.22	24.7812
									2021-12-24 21:22:59	22.22	24.7545
									2021-12-24 21:24:00	22.22	24.7304
									2021-12-24 21:24:59	22.25	24.7883
									2021-12-24 21:26:00	22.31	24.7954
									2021-12-24 21:27:00	22.3	24.7744
									2021-12-24 21:27:59	22.31	24.8075
									2021-12-24 21:29:00	22.34	24.7808
									2021-12-24 21:29:59	22.36	24.8034
									2021-12-24 21:31:00	22.34	24.8099
									2021-12-24 21:31:59	22.42	24.8302
									2021-12-24 21:33:00	22.44	24.7872
									2021-12-24 21:33:59	22.45	24.7839
									2021-12-24 21:35:00	22.47	24.7872
									2021-12-24 21:36:00	22.47	24.7726
									2021-12-24 21:36:59	22.44	24.8091
									2021-12-24 21:38:00	22.44	24.7872
									2021-12-24 21:38:59	22.43	24.7929
									2021-12-24 21:40:00	22.43	24.7492
									2021-12-24 21:40:59	22.42	24.7597
									2021-12-24 21:42:00	22.4	24.725
									2021-12-24 21:42:59	22.38	24.7194
									2021-12-24 21:44:00	22.3	24.7333
									2021-12-24 21:45:00	22.33	24.6947
									2021-12-24 21:45:59	22.39	24.7815
									2021-12-24 21:47:00	22.44	24.7896
									2021-12-24 21:47:59	22.42	24.7937
									2021-12-24 21:49:00	22.39	24.7791
									2021-12-24 21:49:59	22.4	24.8123
									2021-12-24 21:51:00	22.42	24.818
									2021-12-24 21:51:59	22.43	24.8269
									2021-12-24 21:53:00	22.42	24.8107
									2021-12-24 21:54:00	22.4	24.8147
									2021-12-24 21:54:59	22.39	24.8156
									2021-12-24 21:56:00	22.39	24.7986
									2021-12-24 21:56:59	22.36	24.8059
									2021-12-24 21:58:00	22.38	24.7799
									2021-12-24 21:58:59	22.36	24.7913
									2021-12-24 22:00:00	22.36	24.7864
									2021-12-24 22:00:59	22.36	24.8034
									2021-12-24 22:02:00	22.38	24.8115
									2021-12-24 22:03:00	22.42	24.8059
									2021-12-24 22:03:59	22.42	24.8009
									2021-12-24 22:05:00	22.43	24.8147
									2021-12-24 22:05:59	22.47	24.7556
									2021-12-24 22:07:00	22.48	24.8156
									2021-12-24 22:07:59	22.48	24.7888
									2021-12-24 22:09:00	22.47	24.814
									2021-12-24 22:09:59	22.45	24.8058
									2021-12-24 22:11:00	22.45	24.8229
									2021-12-24 22:12:00	22.43	24.8147
									2021-12-24 22:12:59	22.43	24.8002
									2021-12-24 22:14:00	22.43	24.7855
									2021-12-24 22:14:59	22.42	24.7937
									2021-12-24 22:16:00	22.42	24.7937
									2021-12-24 22:16:59	22.4	24.805
									2021-12-24 22:18:00	22.4	24.8002
									2021-12-24 22:18:59	22.42	24.7839
									2021-12-24 22:20:00	22.43	24.7564
									2021-12-24 22:21:00	22.43	24.7783
									2021-12-24 22:21:59	22.43	24.7613
									2021-12-24 22:23:00	22.43	24.805
									2021-12-24 22:23:59	22.43	24.7759
									2021-12-24 22:25:00	22.42	24.7912
									2021-12-24 22:25:59	22.43	24.7759
									2021-12-24 22:27:00	22.43	24.8026
									2021-12-24 22:27:59	22.43	24.8026
									2021-12-24 22:29:00	22.42	24.7816
									2021-12-24 22:30:00	22.43	24.7977
									2021-12-24 22:30:59	22.43	24.7977
									2021-12-24 22:32:00	22.42	24.7718
									2021-12-24 22:32:59	22.42	24.7888
									2021-12-24 22:34:00	22.4	24.7807
									2021-12-24 22:34:59	22.4	24.7977
									2021-12-24 22:36:00	22.39	24.784
									2021-12-24 22:36:59	22.39	24.784
									2021-12-24 22:38:00	22.38	24.7532
									2021-12-24 22:39:00	22.36	24.7816
									2021-12-24 22:39:59	22.36	24.7816
									2021-12-24 22:41:00	22.35	24.7654
									2021-12-24 22:41:59	22.35	24.7606
									2021-12-24 22:43:00	22.35	24.7075
									2021-12-24 22:43:59	22.35	24.6978
									2021-12-24 22:45:00	22.34	24.7517
									2021-12-24 22:45:59	22.34	24.73
									2021-12-24 22:47:00	22.34	24.7493
									2021-12-24 22:48:00	22.33	24.7502
									2021-12-24 22:48:59	22.31	24.776
									2021-12-24 22:50:00	22.31	24.7542
									2021-12-24 22:50:59	22.31	24.7494
									2021-12-24 22:52:00	22.31	24.7494
									2021-12-24 22:52:59	22.3	24.7551
									2021-12-24 22:54:00	22.3	24.7551
									2021-12-24 22:54:59	22.29	24.7148
									2021-12-24 22:56:00	22.26	24.7222
									2021-12-24 22:57:00	22.22	24.7136
									2021-12-24 22:57:59	22.2	24.6937
									2021-12-24 22:59:00	22.2	24.6744
									2021-12-24 22:59:59	22.2	24.7322
									2021-12-24 23:01:00	22.2	24.7322
									2021-12-24 23:01:59	22.17	24.7299
									2021-12-24 23:03:00	22.17	24.7202
									2021-12-24 23:03:59	22.16	24.7211
									2021-12-24 23:05:00	22.17	24.7275
									2021-12-24 23:06:00	22.15	24.7148
									2021-12-24 23:06:59	22.12	24.7246
									2021-12-24 23:08:00	22.11	24.7302
									2021-12-24 23:08:59	22.1	24.7095
									2021-12-24 23:10:00	22.07	24.7242
									2021-12-24 23:10:59	22.06	24.6915
									2021-12-24 23:12:00	22.06	24.7035
									2021-12-24 23:12:59	22.06	24.6795
									2021-12-24 23:14:00	22.04	24.6909
									2021-12-24 23:15:00	22.04	24.6693
									2021-12-24 23:15:59	22.04	24.6693
									2021-12-24 23:17:00	22.04	24.6693
									2021-12-24 23:17:59	22.06	24.6532
									2021-12-24 23:19:00	22.07	24.7002
									2021-12-24 23:19:59	22.07	24.6739
									2021-12-24 23:21:00	22.08	24.6754
									2021-12-24 23:21:59	22.08	24.6538
									2021-12-24 23:23:00	22.08	24.6873
									2021-12-24 23:24:00	22.08	24.6658
									2021-12-24 23:24:59	22.07	24.6451
									2021-12-24 23:26:00	22.08	24.6323
									2021-12-24 23:26:59	22.07	24.638
									2021-12-24 23:28:00	22.03	24.613
									2021-12-24 23:28:59	22.02	24.6019
									2021-12-24 23:30:00	21.98	24.6009
									2021-12-24 23:30:59	21.96	24.6027
									2021-12-24 23:32:00	21.96	24.5647
									2021-12-24 23:33:00	21.96	24.5434
									2021-12-24 23:33:59	21.98	24.5961
									2021-12-24 23:35:00	21.98	24.5747
									2021-12-24 23:35:59	21.97	24.5472
									2021-12-24 23:37:00	21.96	24.5434
									2021-12-24 23:37:59	21.92	24.5211
									2021-12-24 23:39:00	21.9	24.5135
									2021-12-24 23:39:59	21.89	24.5192
									2021-12-24 23:41:00	21.89	24.4768
									2021-12-24 23:42:00	21.88	24.4778
									2021-12-24 23:42:59	21.88	24.4473
									2021-12-24 23:44:00	21.87	24.4858
									2021-12-24 23:44:59	21.87	24.4459
									2021-12-24 23:46:00	21.85	24.4478
									2021-12-24 23:46:59	21.85	24.4011
									2021-12-24 23:48:00	21.84	24.3716
									2021-12-24 23:48:59	21.83	24.3284
									2021-12-24 23:50:00	21.84	24.36
									2021-12-24 23:51:00	21.87	24.3548
									2021-12-24 23:51:59	21.84	24.2557
									2021-12-24 23:53:00	21.81	24.1965
									2021-12-24 23:53:59	21.83	24.2729
									2021-12-24 23:55:00	21.87	24.3292
									2021-12-24 23:55:59	21.83	24.2199
									2021-12-24 23:57:00	21.85	24.2478
									2021-12-24 23:57:59	21.81	24.0367
									2021-12-24 23:59:00	21.8	23.9857
									2021-12-25	21.81	24.0344
									2021-12-25 00:00:59	21.85	24.1765
									2021-12-25 00:02:00	21.88	24.2681
									2021-12-25 00:02:59	21.87	24.1562
									2021-12-25 00:04:00	21.85	24.1032
									2021-12-25 00:04:59	21.85	24.1238
									2021-12-25 00:06:00	21.84	24.0451
									2021-12-25 00:06:59	21.85	24.0919
									2021-12-25 00:08:00	21.8	23.909
									2021-12-25 00:09:00	21.8	23.9135
									2021-12-25 00:09:59	21.81	23.9282
									2021-12-25 00:11:00	21.81	23.899
									2021-12-25 00:11:59	21.8	23.9248
									2021-12-25 00:13:00	21.83	23.9623
									2021-12-25 00:13:59	21.83	23.9781
									2021-12-25 00:15:00	21.83	23.9555
									2021-12-25 00:15:59	21.84	23.9342
									2021-12-25 00:17:00	21.83	23.9105
									2021-12-25 00:18:00	21.84	23.9522
									2021-12-25 00:18:59	21.85	23.9783
									2021-12-25 00:20:00	21.84	23.9432
									2021-12-25 00:20:59	21.84	23.8646
									2021-12-25 00:22:00	21.81	23.8699
									2021-12-25 00:22:59	21.83	23.8053
									2021-12-25 00:24:00	21.8	23.6863
									2021-12-25 00:24:59	21.8	23.7195
									2021-12-25 00:26:00	21.81	23.8386
									2021-12-25 00:27:00	21.81	23.8274
									2021-12-25 00:27:59	21.8	23.7572
									2021-12-25 00:29:00	21.81	23.8677
									2021-12-25 00:29:59	21.8	23.7261
									2021-12-25 00:31:00	21.81	23.7762
									2021-12-25 00:31:59	21.81	23.8341
									2021-12-25 00:33:00	21.83	23.8656
									2021-12-25 00:33:59	21.81	23.8766
									2021-12-25 00:35:00	21.79	23.584
									2021-12-25 00:36:00	21.76	23.5152
									2021-12-25 00:36:59	21.75	23.4447
									2021-12-25 00:38:00	21.75	23.4447
									2021-12-25 00:38:59	21.75	23.3283
									2021-12-25 00:40:00	21.74	23.2759
									2021-12-25 00:40:59	21.74	23.3102
									2021-12-25 00:42:00	21.75	23.2855
									2021-12-25 00:42:59	21.72	23.1528
									2021-12-25 00:44:00	21.69	23.0071
									2021-12-25 00:45:00	21.69	22.9488
									2021-12-25 00:45:59	21.65	22.7188
									2021-12-25 00:47:00	21.62	22.4124
									2021-12-25 00:47:59	21.58	22.1307
									2021-12-25 00:49:00	21.58	22.2633
									2021-12-25 00:49:59	21.56	22.2383
									2021-12-25 00:51:00	21.49	21.7042
									2021-12-25 00:51:59	21.51	21.7278
									2021-12-25 00:53:00	21.51	21.6997
									2021-12-25 00:54:00	21.39	21.0916
									2021-12-25 00:54:59	21.38	21.0948
									2021-12-25 00:56:00	21.4	21.3156
									2021-12-25 00:56:59	21.43	21.5119
									2021-12-25 00:58:00	21.39	21.2127
									2021-12-25 00:58:59	21.38	21.248
									2021-12-25 01:00:00	21.37	21.2064
									2021-12-25 01:00:59	21.37	21.3323
									2021-12-25 01:02:00	21.39	21.4951
									2021-12-25 01:03:00	21.39	21.5282
									2021-12-25 01:03:59	21.47	22.1754
									2021-12-25 01:05:00	21.48	22.2034
									2021-12-25 01:05:59	21.46	22.0472
									2021-12-25 01:07:00	21.44	22.0095
									2021-12-25 01:07:59	21.44	22.1695
									2021-12-25 01:09:00	21.4	22.0395
									2021-12-25 01:09:59	21.4	22.0895
									2021-12-25 01:11:00	21.44	22.2513
									2021-12-25 01:12:00	21.48	22.3641

## Sheet: Water quality in Fukido
Place	Time	Tide	Water Temperature (°C)	Salinity	DO (%)	pHT	TA (µM)	DIC (µM)	ΔTA (µM)	ΔDIC (µM)
	2021-08-17 13:00:00	Ebb	33.545	30.983	104.79	7.972	2439.64	2224.98	850.994	661.182
	2021-08-17 14:30:00	Flood	33.664	33.438	125.96	8.067	2224.03	1954.29	575.987	345.818
	2021-08-17 16:00:00	Flood	33.71	33.629	125.05	8.065	2191.68	1926.77	541.009	316.881
	2021-08-17 17:30:00	Flood	33.239	33.481	105.39	7.958	2289.95	2073.64	640.141	462.867
	2021-08-17 19:00:00	Ebb	31.856	30.991	59.03	7.595	2590.51	2536.17	1011.23	991.973
	2021-08-17 20:30:00	Ebb	30.868	29.398	35.91	7.508	2763.61	2744.27	1260.1	1279.04
	2021-08-17 22:00:00	Ebb	30.892	30.437	43.94	7.593	2576.22	2518.83	1014.16	991.251
	2021-08-17 23:30:00	Flood	30.723	34.083	120.39	8.155	2169.2	1847.4	512.063	235.906
	2021-08-18 01:00:00	Flood	30.339	34.071	113.5	8.134	2180.32	1873.92	523.001	261.644
	2021-08-18 02:30:00	Flood	30.245	34.08	112.3	8.143	2179.46	1868.96	522.031	256.778
	2021-08-18 04:00:00	Flood	30.133	34.038	93.7	8.03	2212.31	1960.49	554.485	345.726
	2021-08-18 05:30:00	Ebb	29.506	33.032	42.9	7.468	2463	2436.93	821.515	831.657
	2021-08-18 07:00:00	Ebb	28.942	32.16	38.9	7.411	2777.02	2801.96	1165.62	1228.32
	2021-08-18 08:30:00	Ebb	29.553	33.274	39.22	7.268	3067.62	3181.97	1414.45	1563.62
	2021-08-18 10:00:00	Ebb	31.241	33.351	51.83	7.311	3031.45	3116.5	1375.44	1495.3
	2021-08-18 11:30:00	Ebb	33.054	33.45	60.78	7.437	3065.65	3088.07	1405.07	1462.87
	2022-08-21 12:00:05	Ebb	34.554	29.166	110.9	7.877	2612.2	2428.44	1099.02	932.298
	2022-08-21 14:00:05	Flood	35.596	33.324	113.39	7.989	2256.3	2023.59	609.879	415.546
	2022-08-21 16:00:05	Flood	35.668	33.318	113.89	8.012	2251.17	2006.18	604.914	398.396
	2022-08-21 18:00:05	Flood	34.833	33.507	100.23	7.973	2234	2011.49	584.61	401.373
	2022-08-21 20:00:05	Flood	34.498	33.337	91.28	7.924	2263.07	2066.03	616.33	457.345
	2022-08-21 22:00:05	Flood	33.915	33.384	78.76	7.864	2264.14	2092.97	616.514	483.291
	2022-08-22 00:00:05	Flood	32.944	34.032	91.24	8.047	2207.31	1946.03	549.742	331.782
	2022-08-22 02:00:05	Flood	32.178	34.134	95.76	8.027	2169.69	1923.42	511.776	308.955
	2022-08-22 04:00:05	Flood	31.901	34.143	84	8.011	2220.48	1979.35	560.662	362.872
	2022-08-22 06:00:05	Ebb	31.047	32.795	30.7	7.4	2454.88	2453.09	819.291	853.908
	2022-08-22 08:00:05	Ebb	29.578	33.041	34.62	7.226	2843.62	2944.74	1200.98	1337.99
	2022-08-22 10:00:05	Ebb	31.801	33.839	48.29	7.405	3285.48	3289.3	1603.04	1642.05
	2022-08-22 12:00:05	Ebb	35.34	33.985	67.85	7.526	3333.42	3279.35	1642.65	1625.35
River West			25.191	0.241	84.378	7.471	1896.45	1849.34
River Middle			26.021	0.207	91.051	7.507	1600.17	1538.01
River East			26.318	0.2	80.439	7.292	1422.45	1423.02
